# Supplementary material for: Rapid Detection of Bacterial Pathogens and Antimicrobial Resistance Genes in Clinical Urine Samples With Urinary Tract Infection by Metagenomic Nanopore Sequencing
Source: Front Microbiol. 2022 May 17;13:858777. doi: 10.3389/fmicb.2022.858777 (PMC9152355; doi:10.3389/fmicb.2022.858777)
Supplement: Supplementary file 3 [file Table_3.XLSX]

## Sheet: Sheet1
Table S3. Comparison of three library preparation methods and the sensitivity of each based on culture results.
Sample ID	Culture	PBK results								16S results								RBK results
		#Pathogen Reads	Most Abundant Species	Read Number	Proportion	Next Most Abundant Species	Read Number	Proportion	Consistency	#Pathogen Reads	Most Abundant Species	Read Number	Proportion	Next Most Abundant Species	Read Number	Proportion	Consistency	#Pathogen Reads	Most Abundant Species	Read Number	Proportion	Next Most Abundant Species	Read Number	Proportion	Consistency
P1	Escherichia coli	2057	Escherichia coli	1790	0.870199	Klebsiella pneumoniae	72	0.0350024	+	1134	Escherichia coli	1031	0.909171	Shigella flexneri	22	0.0194004	+	2011	Escherichia coli	1423	0.707608	Klebsiella pneumoniae	250	0.124316	+
P2	Escherichia coli	38939	Escherichia coli	37727	0.968874	Shigella flexneri	354	0.00909114	+	2498	Escherichia coli	2056	0.823058	Shigella dysenteriae	128	0.051241	+	1655	Escherichia coli	1481	0.894864	Shigella boydii	60	0.0362538	+
P3	Enterobacter hormaechei	23297	Enterobacter hormaechei	20730	0.889814	Enterobacter sp.	646	0.0277289	+	2734	Enterobacter hormaechei	2530	0.925384	Escherichia coli	63	0.0230432	+	16164	Enterobacter hormaechei	13925	0.861482	Klebsiella pneumoniae	476	0.0294482	+
P4	Klebsiella pneumoniae	276	Klebsiella pneumoniae	211	0.764493	Staphylococcus aureus	33	0.119565	+	275	Klebsiella pneumoniae	224	0.814545	Klebsiella variicola	15	0.0545455	+	451	Escherichia coli	215	0.476718	Klebsiella pneumoniae	129	0.286031	-
P5	Enterococcus faecium	12849	Enterococcus faecium	11284	0.878201	Corynebacterium segmentosum	206	0.0160324	+	1423	Enterococcus faecium	693	0.486999	Murdochiella vaginalis	177	0.124385	+	6	Escherichia coli	3	0.5	Enterococcus faecium	1	0.166667	-
P6	Pseudomonas aeruginosa	77473	Pseudomonas aeruginosa	75602	0.97585	Pseudomonas fluorescens	817	0.0105456	+	5931	Pseudomonas aeruginosa	5911	0.996628	Pseudomonas sp.	12	0.00202327	+	3213	Pseudomonas aeruginosa	3125	0.972611	Escherichia coli	27	0.00840336	+
P7	Corynebacterium	3137	Corynebacterium	2019	0.643609	Mobiluncus	123	0.0392094	+	300	Anaerococcus	57	0.19	Peptoniphilus	54	0.18	-	17	Escherichia coli	12	0.705882	Shigella boydii	2	0.117647	-
P8	Proteus mirabilis	36148	Enterococcus faecalis	27942	0.772989	Proteus mirabilis	4217	0.116659	-	919	Enterococcus faecalis	845	0.919478	Proteus mirabilis	45	0.0489663	-	2816	Enterococcus faecalis	2228	0.791193	Proteus mirabilis	252	0.0894886	-
P9	Enterococcus faecalis	695	Veillonella parvula	227	0.326619	Enterococcus faecalis	173	0.248921	-	979	Enterococcus faecalis	386	0.39428	Streptococcus agalactiae	357	0.364658	-	85	Escherichia coli	40	0.470588	Klebsiella pneumoniae	10	0.117647	-
P10	Escherichia coli	16732	Escherichia coli	13397	0.800681	Citrobacter freundii	2197	0.131305	+	25253	Escherichia coli	15279	0.605037	Citrobacter freundii	8464	0.335168	+	4602	Escherichia coli	3564	0.774446	Citrobacter freundii	343	0.0745328	+
P11	Corynebacterium striatum	20720	Corynebacterium striatum	19128	0.923166	Corynebacterium simulans	637	0.0307432	+	26821	Corynebacterium striatum	26343	0.982178	Staphylococcus epidermidis	311	0.0115954	+	1209	Escherichia coli	583	0.482217	Corynebacterium striatum	495	0.409429	-
P12	Escherichia coli	72910	Escherichia coli	69563	0.954094	Lactobacillus iners	2117	0.0290358	+	21969	Escherichia coli	20536	0.934772	Shigella flexneri	351	0.0159771	+	7406	Escherichia coli	6740	0.910073	Shigella boydii	193	0.02606	+
P13	Escherichia coli	346	Klebsiella pneumoniae	127	0.367052	Staphylococcus aureus	71	0.205202	-	854	Escherichia coli	350	0.409836	Lactobacillus gasseri	314	0.367681	-	950	Escherichia coli	672	0.707368	Klebsiella pneumoniae	138	0.145263	+
P14	Enterococcus faecium	62142	Enterococcus faecium	61612	0.991471	Staphylococcus aureus	208	0.00334717	+	17159	Enterococcus faecium	17036	0.992832	Enterococcus lactis	28	0.0016318	+	9595	Enterococcus faecium	8316	0.866701	Escherichia coli	764	0.0796248	+
P15	Escherichia coli	846	Escherichia coli	709	0.838061	Klebsiella pneumoniae	18	0.0212766	+	2589	Escherichia coli	733	0.283121	Crassaminicella sp.	108	0.0417149	+	652	Escherichia coli	594	0.911043	Shigella boydii	26	0.0398773	+
P16	Escherichia coli	60845	Escherichia coli	58951	0.968872	Salmonella sp.	428	0.00703427	+	16644	Escherichia coli	15033	0.903208	[Clostridium] hiranonis	441	0.026496	+	5901	Escherichia coli	5469	0.926792	Shigella boydii	135	0.0228775	+
P17	Staphylococcus haemolyticus	227	Corynebacterium jeikeium	69	0.303965	Staphylococcus aureus	44	0.193833	-	737	Staphylococcus haemolyticus	508	0.689281	Finegoldia magna	80	0.108548	+	888	Escherichia coli	670	0.754505	Klebsiella pneumoniae	99	0.111486	-
P18	Enterococcus faecium	9061	Enterococcus faecium	8841	0.97572	Staphylococcus aureus	42	0.00463525	+	8026	Enterococcus faecium	7935	0.988662	Enterococcus lactis	21	0.0026165	+	2140	Escherichia coli	1025	0.478972	Enterococcus faecium	989	0.46215	-
P19	Escherichia coli	19064	Escherichia coli	17772	0.932228	Lactobacillus paragasseri	450	0.0236047	+	4568	Escherichia coli	3623	0.793126	Lactobacillus gasseri	624	0.136602	+	8431	Escherichia coli	7556	0.896216	Lactobacillus gasseri	204	0.0241964	+
P20	Enterococcus gallinarum	2273	Enterococcus gallinarum	757	0.33304	Corynebacterium striatum	430	0.189177	+	664	Enterococcus gallinarum	356	0.536145	Anaerococcus mediterraneensis	139	0.209337	+	1753	Escherichia coli	1548	0.883058	Shigella boydii	100	0.0570451	-
	Corynebacterium striatum
Sensitivity									16/20								16/20								0.55
Symbol: +: positive, -: negative. #Pathogen Reads: total number of pathogen reads.
